# Supplementary material for: Intratumoral STING Agonist Injection Combined with Irreversible Electroporation Delays Tumor Growth in a Model of Hepatocarcinoma
Source: Hindawi journal article supplement (doi:10.1155/2021/8852233), 2021-01-01

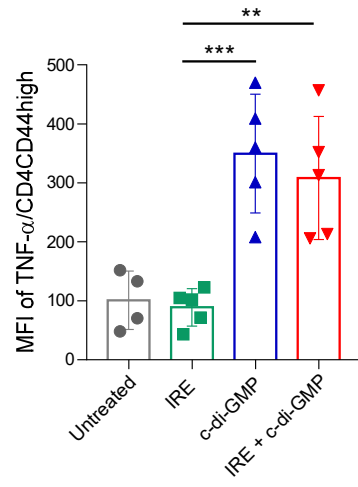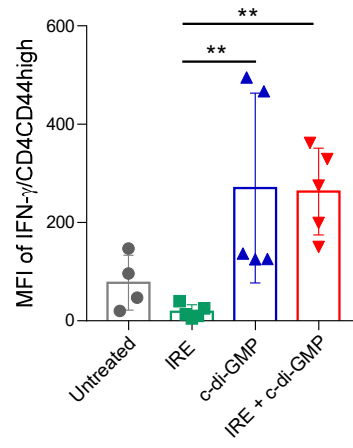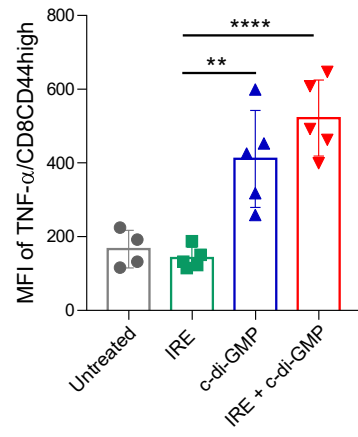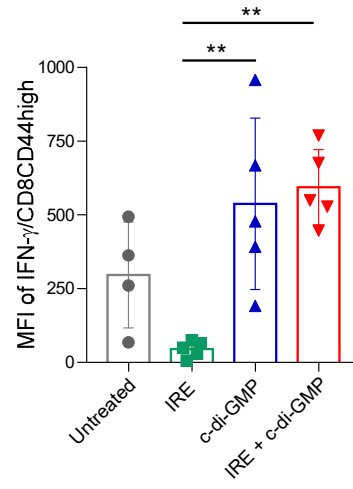

Supplement: f1 [file 8852233.f1.pdf]
